# Supplementary material
Source: ML conference proceedings conference paper supplement (https://openaccess.thecvf.com/content/CVPR2024/html/Li_TextCraftor_Your_Text_CVPR_2024_paper.html)
Supplement: Supplementary file 1 [file Li_TextCraftor_Your_Text_CVPR_2024_supplemental.pdf]

## A. Ablation on Scheduler and Denoising Steps

The main paper uses a 25-step DDIM scheduler as the default configuration. We provide an additional study on the choice of scheduler type and denoising steps in Tab. 4. We find that the widely adopted DDIM scheduler already yields satisfactory performance, which is comparable to or even better than second-order counterparts such as DPM. We also find that 25 denoising steps are good enough for generative quality, while increasing the inference steps to 50 has minimal impact on performance.

Table 4. Ablation study on denoising scheduler and steps. We choose TextCrafter on all rewards as the baseline model.

| Scheduler | Steps | Aesthetic | PickScore | HPSv2  |
|-----------|-------|-----------|-----------|--------|
| DDIM      | 25    | 5.8800    | 19.157    | 0.2805 |
| DDIM      | 50    | 6.0178    | 19.121    | 0.2769 |
| PNDM      | 25    | 5.0991    | 18.479    | 0.2632 |
| PNDM      | 50    | 5.9355    | 19.026    | 0.2748 |
| DPM       | 25    | 5.8564    | 19.145    | 0.2803 |
| Euler     | 25    | 5.9098    | 19.151    | 0.2804 |

## B. Weight of Reward Functions

With TextCrafter, it is free to choose different reward functions and different weights as the optimization objective. For simplicity, in the main paper, we scale all the rewards to the same magnitude. We report empirical results by setting the weight of CLIP constraint to 100, Aesthetic reward as 1, PickScore as 1, and HPSv2 as 100. In Tab. 5, we provide an additional ablation study on different reward weights. Specifically, we train TextCrafter with emphasis on CLIP regularization, Aesthetic score, PickScore, and HPSv2 respectively. We can observe that assigning a higher weight to a specific reward simply results in better scores. TextCrafter is flexible and readily applicable to different user scenarios and preferences. We observe the issue of repeated objects in Fig. 9, which is introduced along with UNet fine-tuning. Thus, we ablate TextCrafter+UNet fine-tuning with differ-

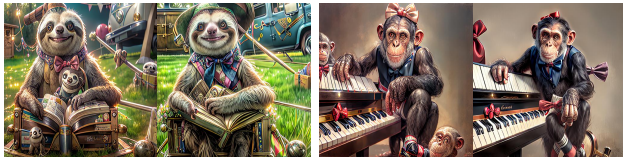

Figure 7. Adjusting reward weights can further reduce artifacts (repeated objects.)

ent weights of rewards. We find that HPSv2 is the major source of repeated objects. We show in Fig. 7 that we can remove the repeated *sloth* and *chimpanzee* by using a smaller weight of HPSv2 reward.

## C. Ablation of Training and Testing Steps.

As discussed in Section 3.2, the reward fine-tuning introduces a long chain for gradient propagation. With the danger of gradient explosion and vanishing, it is not necessarily optimal to fine-tune over all timesteps. In Tab. 6, we perform the analysis on the training and evaluation steps for TextCrafter. We find that training with 5 gradient steps and evaluating the fine-tuned text encoder with 15 out of the total 25 steps gives the most balanced performance. In all of our experiments and reported results, we employ this configuration.

## D. Discussion on Training Cost and Data

TextCrafter is trained on 64 NVIDIA A100 80G GPUs, with batch size 4 per GPU. We report all empirical results of TextCrafter by training 10K iterations, and the UNet fine-tuning (TextCrafter+UNet) with another 10K iterations. Consequently, TextCrafter observes 2.56 million data samples. TextCrafter overcomes the collapsing issue thus eliminating the need for tricks like early stopping. The estimated GPU hour for TextCrafter is about 2300. Fine-tuning larger diffusion models can lead to increased training costs. However, TextCrafter has a strong generalization capability. As in Fig 10, the fine-tuned SDv1.5 text encoder (ViT-L) can be directly applied to SDXL [34] to generate better results (for each pair, *left*: SDXL, *right*: SDXL + TextCrafter-ViT-L). Note that SDXL employs two text encoders and we only replace the ViT-L one. Therefore, to reduce the training cost on larger diffusion models, one interesting future direction is to fine-tune their text encoder within a smaller diffusion pipeline, and then do inference directly with the larger model.

## E. Interpretability

We further demonstrate the enhanced semantic understanding ability of TextCrafter in Fig. 8. Similar to Prompt to Prompt [16], we visualize the cross-attention heatmap which determines the spatial layout and geometry of the generated image. We discuss two failure cases of the baseline model in Fig. 8. The first is misaligned semantics, as the *purple* hat of the corgi. We can see that the hat in pixel space correctly attends to the word *purple*, but in fact, the color is wrong (red). Prompt engineering does not resolve this issue. While in TextCrafter, color *purple* is correctly reflected in the image. The second failure case is missing elements. SDv1.5 sometimes fails to generate desired objects, i.e., *Eiffel Tower* or *desert*, where there is hardly any attention energy upon the corresponding words. Prompt engineering introduces many irrelevant features and styles, but can not address the issue of the missing *desert*. While with TextCrafter, both *Eiffel Tower* and *desert* are correctly understood and reflected in the image. We show that (i) Fine-

Table 5. Ablation study on different reward weights. The reported results are TextCrafter for text encoder only.

| Weight |           |           |       | Score  |           |           |        |
|--------|-----------|-----------|-------|--------|-----------|-----------|--------|
| CLIP   | Aesthetic | PickScore | HPSv2 | CLIP   | Aesthetic | PickScore | HPSv2  |
| 200    | 3         | 1         | 100   | 0.2952 | 6.0900    | 19.123    | 0.2757 |
| 100    | 6         | 1         | 100   | 0.2385 | 7.1680    | 19.435    | 0.2730 |
| 100    | 3         | 2         | 100   | 0.2615 | 6.6831    | 19.494    | 0.2798 |
| 100    | 3         | 1         | 200   | 0.2711 | 6.4020    | 19.306    | 0.2850 |

Table 6. Analysis of training and evaluation steps for fine-tuned text encoder. We report results on Parti-Prompts [59].

| Train  | Test | Aes    | PickScore | HPSv2  |
|--------|------|--------|-----------|--------|
| SDv1.5 | 25   | 5.2634 | 18.834    | 0.2703 |
| 5      | 5    | 6.0688 | 19.195    | 0.2835 |
| 5      | 10   | 6.3871 | 19.336    | 0.2847 |
| 5      | 15   | 6.5295 | 19.355    | 0.2828 |
| 5      | 25   | 6.5758 | 19.071    | 0.2722 |
| 10     | 10   | 5.8680 | 19.158    | 0.2799 |
| 15     | 15   | 5.3533 | 18.919    | 0.2735 |

tuning the text encoder improves its capability and has the potential to correct some inaccurate semantic understandings. (ii) Finetuning text encoder helps to emphasize the core object, reducing the possibility of missing core elements in the generated image, thus improves text-image alignment, as well as benchmark scores.

## F. Applications

We apply TextCrafter on ControlNet [60] and image inpainting for zero-shot evaluation (*i.e.*, the pre-trained text encoder from TextCrafter is *directly* applied on these tasks), as in Fig. 11 and Fig. 12. We can see that TextCrafter can readily generalize to downstream tasks (with the same pre-trained baseline model, *i.e.*, SDv1.5), and achieves better generative quality.

## G. More Qualitative Results

We provide more qualitative visualizations in Fig. 9 to demonstrate the performance and generalization of TextCrafter.

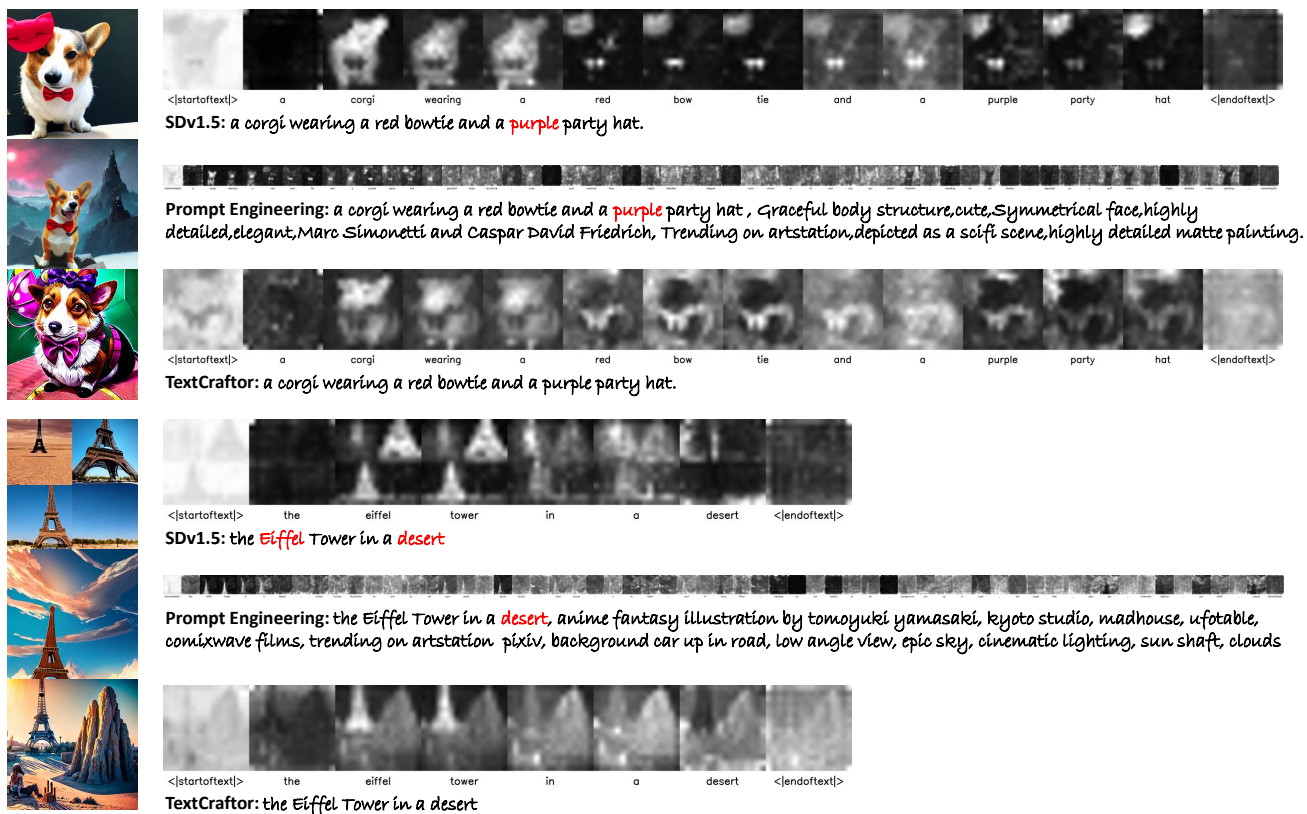

Figure 8. Illustration of the enhanced semantic understanding in TextCrafter, visualized by the cross-attention heatmap.

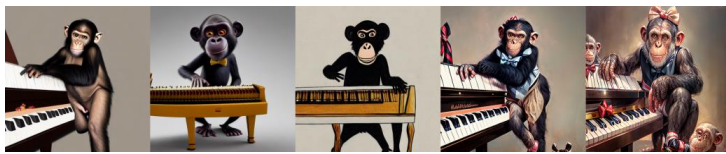

a chimpanzee wearing a bowtie and playing a piano

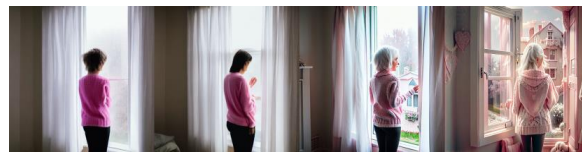

A white-haired girl in a pink sweater looks out a window in her bedroom.

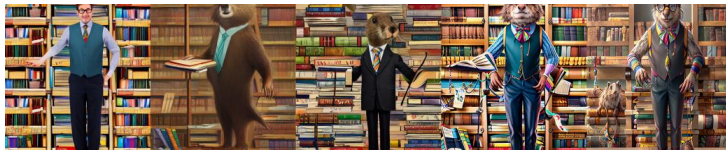

A dignified beaver wearing glasses, a vest, and colorful neck tie. He stands next to a tall stack of books in a library.

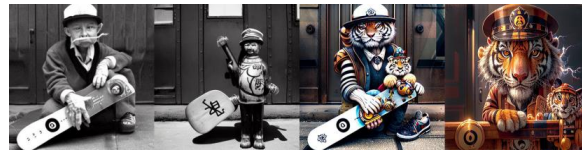

A tiger wearing a train conductor's hat and holding a skateboard decorated with a yin-yang symbol.

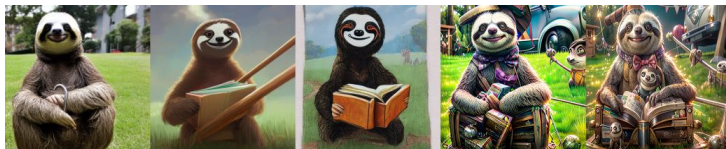

A smiling sloth wearing a bowtie and holding a quarterstaff and a big book. A shiny VW van parked on grass.

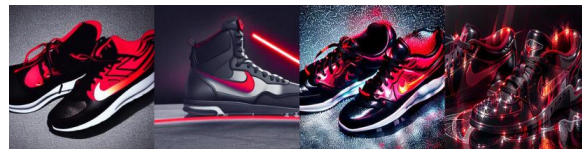

A product still of metallic black and white Nike shoes with a red glowing swoosh, styled after Darth Vader.

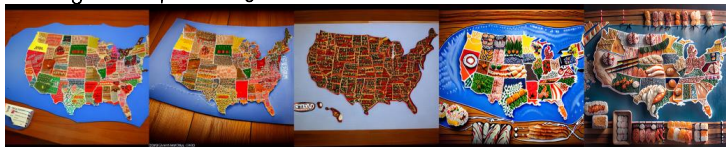

A map of the United States made out of sushi on the table.

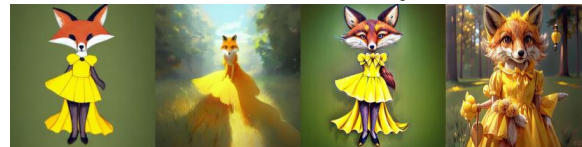

A fox wearing a yellow dress.

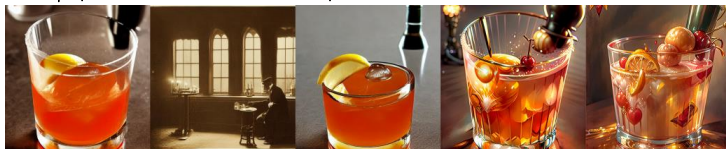

an old-fashioned cocktail

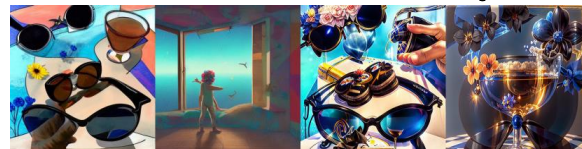

A toast with black sunglasses and a blue flower on the top right corner.

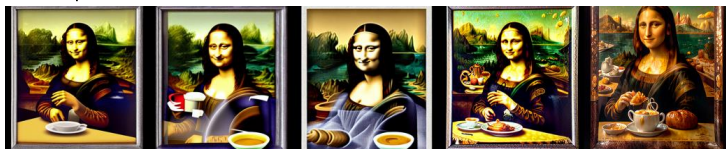

a photograph of the mona lisa drinking coffee as she has her breakfast. her plate has an omelette and croissant.

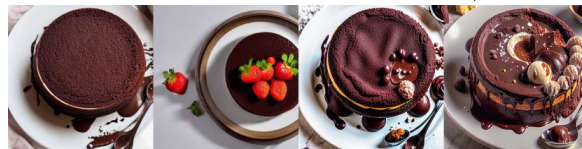

there is a chocolate cake and ice cream on a plate

Figure 9. **Additional visualizations.** *Left:* generated images on Parti-Prompts, in the order of SDv1.5, prompt engineering, DDPO, TextCrafter, and TextCrafter + UNet. *Right:* examples from HPSv2, ordered as SDv1.5, prompt engineering, TextCrafter, and TextCrafter + UNet.

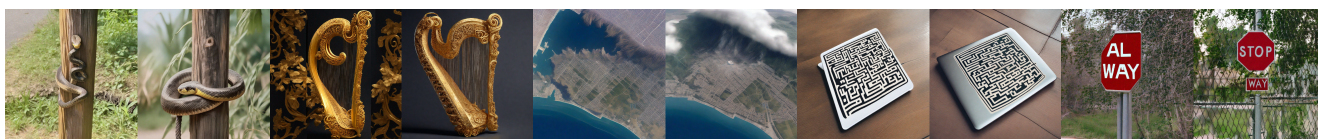

a snake curled around a wooden post

an ornate gold harp

a satellite image...mountain to the north...cloud covering...

a laptop with a maze sticker on it

a stop sign with 'ALL WAY' written below it

Figure 10. Applying the fine-tuned SDv1.5 text encoder (ViT-L) under TextCrafter to SDXL can improve the generation quality, e.g., better text-image alignment. For each pair of images, the left one is generated using SDXL and the right one is from SDXL+TextCrafter.

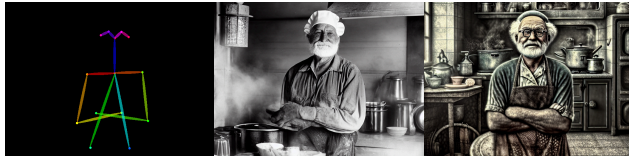

Pose2image. Prompt: *An old man cooking in kitchen, vintage.*

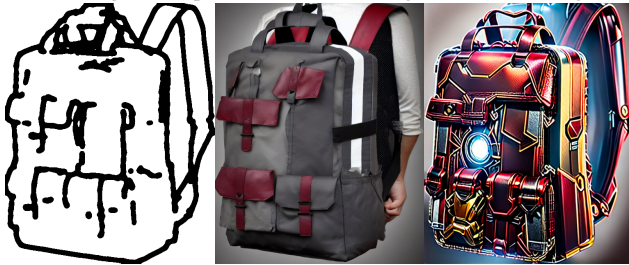

Scribble2image. Prompt: *Backpack for iron man.*

Figure 11. Applying the fine-tuned SDv1.5 text encoder (ViT-L) under TextCrafter to ControlNet improves the generation quality. From left to right: input condition, SDv1.5, TextCrafter + SDv1.5 UNet.

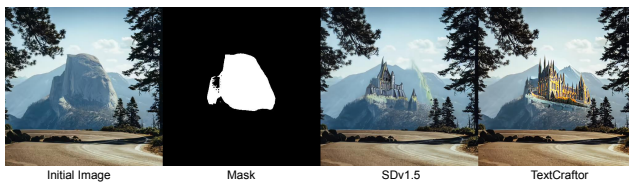

Figure 12. Applying TextCrafter on inpainting task can improve the generation quality. The prompt in the example is *concept art digital painting of an elven castle, inspired by lord of the rings.*
